# Supplementary material for: Is a higher frequency of esophageal dilations more effective in treating benign esophageal strictures? Retrospective, multicenter study
Source: PubMed Central journal article supplement — Endosc Int Open. 2024 Jan 10;12(1):E78–89. doi: 10.1055/a-2117-8197 (PMC10781580; doi:10.1055/a-2117-8197), 2024-01-10
Supplement: 10-1055-a-2117-8197_21324814.pdf [file 10-1055-a-2117-8197_21324814.pdf]

## Supplementary material

Appendix Table 1. Adverse events of endoscopic dilations

| Adverse event                      | Events in Patients of Center 1* | Events in Patients of Center 2* | p    |
|------------------------------------|---------------------------------|---------------------------------|------|
| <b>Total adverse events, n (%)</b> | 44 (22.7)                       | 18 (40.9)                       | 0.59 |
| <b>Perforation, n (%)</b>          | 1 (0.5)                         | 0 (0)                           | 0.5  |
| <b>Hemorrhage, n (%)</b>           | 23 (11.9)                       | 8 (18.2)                        | 0.20 |
| <b>Retrosternal pain, n (%)</b>    | 14 (7.2)                        | 9 (20.5)                        | 0.44 |
| <b>Ulcer, n (%)</b>                | 6 (3.1)                         | 1 (2.3)                         | 0.81 |

\*Center 1: University Hospital Frankfurt; Center 2: Sana Klinikum Offenbach.
